# Supplementary material for: Raw Cow’s Milk Reduces Allergic Symptoms in a Murine Model for Food Allergy—A Potential Role for Epigenetic Modifications
Source: PubMed Central journal article supplement (PMC6723026; doi:10.3390/nu11081721), 2019-07-25
Supplement: nutrients-11-01721-s001.pdf [file nutrients-11-01721-s001.pdf]

**Supplementary Materials:** The following are available online at [www.mdpi.com/xxx/s1](http://www.mdpi.com/xxx/s1), Figure S1: Acetylation patterns of histone H3 were comparable to histone H4 in splenocyte derived CD4<sup>+</sup> T cells, Figure S2: No differences between groups observed for histone H3 acetylation in MLN, Table S1: Buffers used for ChIP, Table S2: Primers used for qPCR.

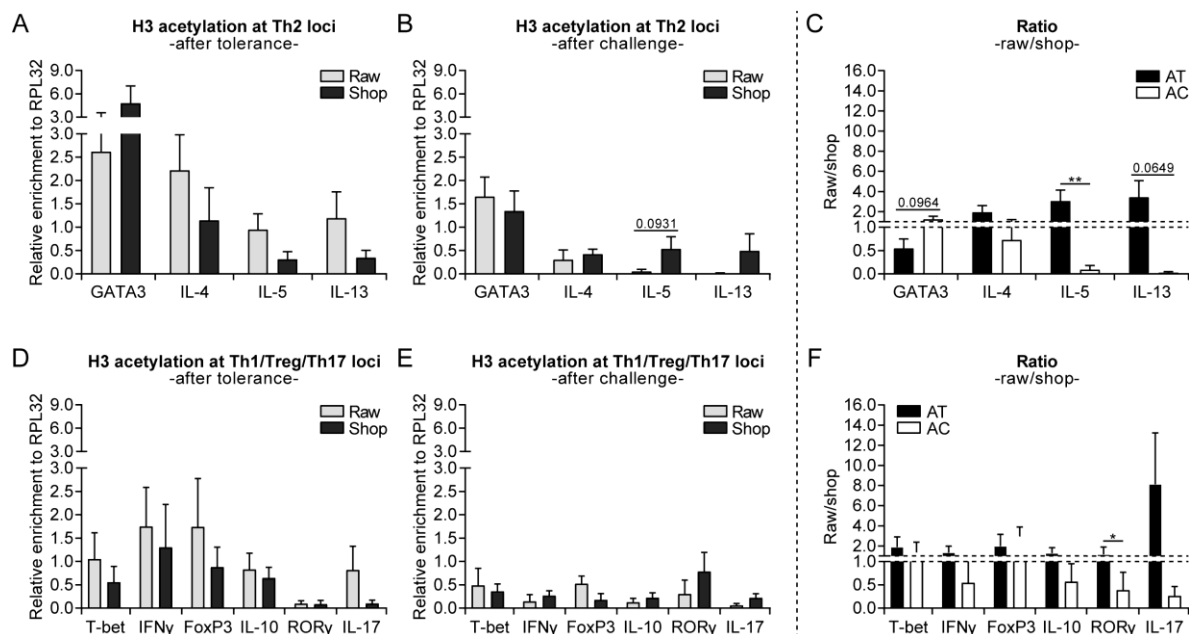

**Figure S1. Acetylation patterns of histone H3 were comparable to histone H4 in splenocyte derived CD4<sup>+</sup> T cells.** (A) Histone H3 acetylation at Th2 loci after the tolerance induction period (day -1), (B) after both challenges (day 34) and (C) the raw milk/shop milk ratio. (D) Histone H3 acetylation at Th1/Treg/Th17 loci after the tolerance induction period (day -1), (E) after both challenges (day 34) and (F) the raw milk/shop milk ratio. Histone H3 acetylation status was determined by means of chromatin immunoprecipitation in CD4<sup>+</sup> T cells derived from splenocytes of raw milk and shop milk treated mice. Results are expressed as relative enrichment after normalization to RPL32 as mean  $\pm$  SEM,  $n = 6$ /group. \* $P < 0.05$ , \*\* $P < 0.01$  as analyzed with a Mann-Whitney test. An unpaired two-tailed Student's  $t$ -test was used for IL-4, IL-5, IL-13, IL-10 (after tolerance), GATA3 (after model) and GATA3 (ratio raw/shop) since data obtained normality. Raw, raw cow's milk; shop, shop milk; AT, after tolerance; AC, after challenge.

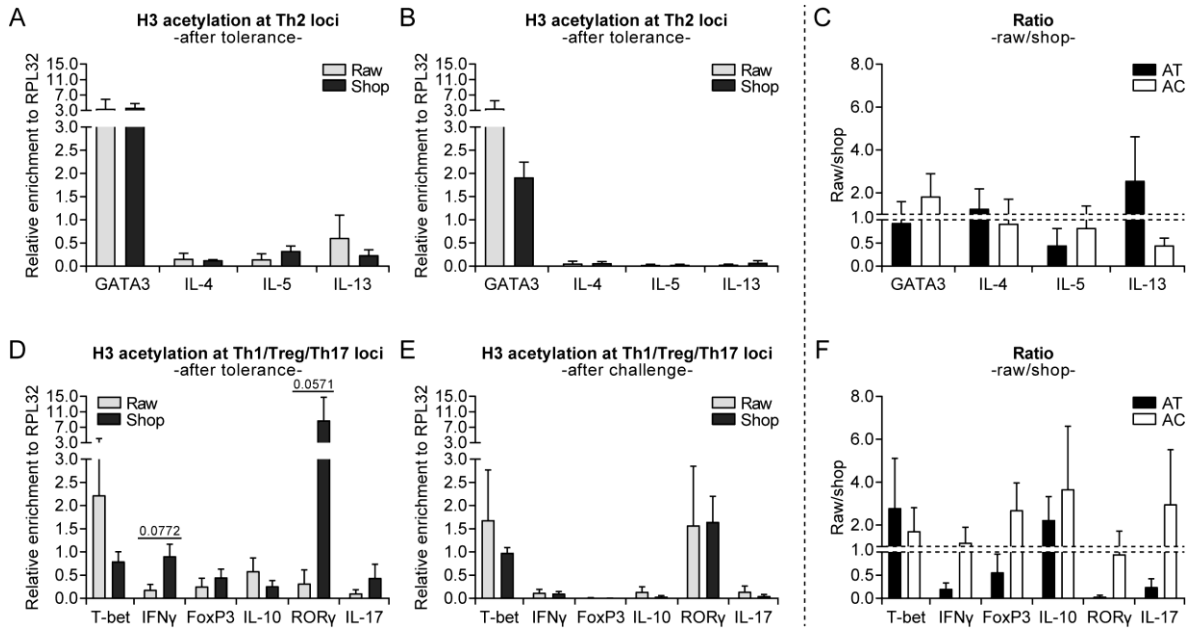

**Figure S2. No differences between groups observed for histone H3 acetylation in MLN.** (A) Histone H3 acetylation at Th2 loci after the tolerance induction period (day -1), (B) after both challenges (day 34) and (C) the raw milk/shop milk ratio. (D) Histone H3 acetylation at Th1/Treg/Th17 loci after the tolerance induction period (day -1), (E) after both challenges (day 34) and (F) the raw milk/shop milk ratio. Histone H3 acetylation status was determined by means of chromatin immunoprecipitation in MLN of raw milk and shop milk treated mice. Results are expressed as relative enrichment after normalization to RPL32 as mean  $\pm$  SEM,  $n = 3-6$ /group. No significant differences were observed. Raw, raw cow's milk; shop, shop milk; AT, after tolerance; AC, after challenge; MLN, mesenteric lymph nodes.

**Table S1. Buffers used for CHIP.**

|                                     |                            |
|-------------------------------------|----------------------------|
| <b>Lysis buffer I</b>               | For 50 mL                  |
| 5 mM PIPES pH 8                     | 0.5 mL 0.5 M PIPES pH 8    |
| 85 mM KCl                           | 1.4 mL 3 M KCl             |
| 0.5% NP40 (Igepal-CA630)            | 0.25 mL Igepal (100%)      |
| Protease inhibitor cocktail tablets | One tablet                 |
| <b>Lysis buffer II</b>              | For 50 mL                  |
| 10 mM Tris-HCl pH 7.5               | 0.5 mL 1 M Tris-HCl pH 7.5 |
| 150 mM NaCl                         | 1.5 mL 5 M NaCl            |
| 1% NP40 (Igepal-CA630)              | 0.5 mL Igepal (100%)       |
| 1% DOC (Natriumdeoxycholat)         | 0.5 g                      |
| 0.1% SDS                            | 0.25 mL 20% SDS            |
| 1 mM EDTA                           | 0.1 mL 0.5 M EDTA pH 8     |
| Protease inhibitor cocktail tablets | One tablet                 |
| <b>Wash buffer I</b>                | For 50 mL                  |
| 20 mM Tris-HCl pH 8                 | 1 mL Tris-HCl pH 8         |
| 150 mM NaCl                         | 1.5 mL 5 M NaCl            |
| 2 mM EDTA                           | 0.2 mL 0.5 M EDTA pH 8     |
| 0.1% SDS                            | 0.25 mL 20% SDS            |
| 1% Triton X100                      | 0.5 mL Triton X100         |
| <b>Wash buffer II</b>               | For 50 mL                  |
| 20 mM Tris-HCl pH 8                 | 1 mL Tris-HCl pH 8         |

|                |                        |
|----------------|------------------------|
| 500 mM NaCl    | 5 mL 5 M NaCl          |
| 2 mM EDTA      | 0.2 mL 0.5 M EDTA pH 8 |
| 0.1% SDS       | 0.25 mL 20% SDS        |
| 1% Triton X100 | 0.5 mL Triton X100     |

|                             |                        |
|-----------------------------|------------------------|
| <b>Wash buffer III</b>      | For 50 mL              |
| 10 mM Tris-HCl pH 8         | 0.5 mL Tris-HCl pH 8   |
| 1% IGEPAL CA630             | 0.5 mL IGEPAL (100%)   |
| 1% DOC (Sodium deoxycholat) | 0.5 g                  |
| 1 mM EDTA                   | 0.1 mL 0.5 M EDTA pH 8 |
| 0.25 M LiCl                 | 1.25 mL 10 M LiCl      |

|                     |                        |
|---------------------|------------------------|
| <b>1 x TE</b>       | For 50 mL              |
| 10 mM Tris-HCl pH 8 | 0.5 mL Tris-HCl pH 8   |
| 1 mM EDTA           | 0.1 mL 0.5 M EDTA pH 8 |

|                          |                               |
|--------------------------|-------------------------------|
| <b>Elution buffer</b>    | For 25 mL                     |
| 1% SDS                   | 1.25 mL 20% SDS               |
| 0.1 M NaHCO <sub>3</sub> | 2.5 mL 1 M NaHCO <sub>3</sub> |

**Table S2. Primers used for qPCR.**

| Locus        | Sequence forward            | Sequence reverse              |
|--------------|-----------------------------|-------------------------------|
| RPL32        | TCA TTT CTC AGG CAC ATC TT  | ACT CAC CGT AAA ACA GAT GG    |
| IL-4         | TCT GCC TCC ATC ATC CTT CT  | ACA CCA TAA TCG GCC TTT CA    |
| IL-5         | ACC CTG AGT TTC AGG ACT CG  | TCC CCA AGC AAT TTA TTC TCT C |
| IL-10        | CGA CCA GTT CTT TAG CGC TT  | TGT GGC TTT GGT AGT GCA AG    |
| IL-13        | CAA CAA AGC AGA GAC CAG GG  | CAG AGC CAG TGA GAG AAC CA    |
| IL-17        | TGG TTC TGT GCT GAC CTC AT  | GCT CTC CCT GGA CTC ATG TT    |
| GATA3        | CAC TCG GAT TCC TCT CTC CC  | CCA GGA GAG GGG TCG TTT AA    |
| T-bet        | CAC TGG TCC ACT GCT CTC TC  | GAG ATG TCC GGT GGT GTC TC    |
| ROR $\gamma$ | TGG GGT GCC TGT CAT CAT AC  | TGA GAA CTT GGC TCC CTG TC    |
| FoxP3        | GAC TCA AGG GGG TCT CA      | TTG GGC TTC ATC GGC AA        |
| IFN $\gamma$ | CAT ACC CTT TCC TTG CTT TTC | TTG TGG GAT TCT CTG AAA GCA   |

All oligonucleotides were synthesized by Metabion (Planegg, Germany).
